# Supplementary material
Source: PubMed Central journal article supplement (PMC3064294)
Supplement: supp_00473.2010_suppmat.pdf [file supp_00473.2010_suppmat.pdf]

## Online Supplements: Expanded Methods

Coronary flow (Fig. 2B) was analyzed (1) subject to prescribed boundary conditions (Fig. 2E; Table 1) and myocardium/vessel interaction (Eq. 3; Fig. 2D). To that end, the network anatomy has been reconstructed (Fig. 2A) from morphometric data (14 -16); and a vessel-in-myocardium micromechanical sub-model (1) was used to describe the *in-situ* vessel compliance (Eq.2; Fig. 2C).

### ***I. Anatomic Reconstruction***

Reconstruction relied on the morphometric data (14-16) and consisted of two stages: reconstruction of microvascular networks, followed by integration into a transmural coronary network.

*Microvascular networks* were reconstructed in an iterative manner, relying on data-based (14-16) vessel lengths, connectivity, and capillary branching pattern, and subject to two constraints: i) the measured (14) distance between arteriolar and venous domains and ii) the ratio between arteriolar and venous segments (14). Initially, one arteriole and two venules were located 510  $\mu\text{m}$  apart. They were assigned order 1 and order -1, respectively (15, 16). Then, arterial and venous capillaries (14) were attached to these corresponding vessels, according to connectivity data (15, 16). Vessels lengths were assigned according to the measured statistical data (14-16). Additional connecting and cross-connecting capillaries were connected to these capillaries according to branching patterns statistics (14). Finally, additional arterioles and venules were connected to the previously posed respective vessels, thus increasing the orders of the input and output vessels. This process was iterated until capillaries bridged the gaps between arteriolar and venous domains, resulting in a network of 174 micro-vessels (Fig. 2A) fed by one order 3 arteriole and two order -3 venules. The network capillary density is roughly 2800 capillaries/ $\text{mm}^2$ , consistent with measured data (3, 21). A student T-test showed (1) no statistically-significant differences between the data and reconstructed network.

*Integration into a coronary network:* To reduce the computational load associated with a full-scale network (13) but still retain realistic morphometric features, reconstructed microvascular networks were placed at representative transmural locations, depending on the assumed anatomy (see methods). The basic configuration assumes transmurally homogeneous vessels density. Hence, microvascular networks were evenly placed at subepicardium (Myocardial Relative Depth,  $MRD=0.125$ ), midwall ( $MRD=0.325$  and  $MRD=0.625$ ) and subendocardium ( $MRD=0.875$ ). In contrary, to simulate twice higher subendocardial vessel density, each

35 microvascular network placed at subepicardium was matched by two subendocardial  
 36 microvascular networks.

37 All microvascular networks were interconnected via intramyocardial arterial and venous  
 38 tree-like networks and linked with the major epicardial vessels. The latter networks, taken to be  
 39 symmetric and dichotomous, were reconstructed based on the morphometric data (15, 16), but  
 40 assigned identical daughter vessels diameters, lengths and outlet flow conditions at each  
 41 bifurcation. The *MRD* of interconnecting vessels was assigned intermediate values, depending on  
 42 their transmural location. The symmetric arterial tree most proximal artery was chosen to be of  
 43 order 8, since these arteries are the first to penetrate the cardiac wall (13). The number of  
 44 generations arising from this artery, and the order of each segment in the arterial tree were  
 45 assigned based on connectivity and segment-to-element data (16). The order of the most distal  
 46 vessels in the arterial tree was set to 4, thus matching the order of the reconstructed  
 47 microvascular inlet arteriole. The length of each segment in the tree was assigned to fit the  
 48 statistical data (16), while maintaining monotonic reduction of diameters along the element. The  
 49 venous tree was reconstructed in a similar manner. The reconstructed network has 906 segments,  
 50 representing the flow in characteristic myocardial layers.

51

## 52 **II. Flow Simulation:**

53 Flow in each vessel was analyzed using a three-element Windkessel model consisting of two  
 54 identical non-linear resistors and one non-linear capacitor (Fig. 2B). This lumped segment flow  
 55 model was previously validated (12) against a distributive (5) model of a coronary vessel. At  
 56 each network bifurcation, mass conservation implies that the sum of discharges  $Q^{jk}$  should  
 57 vanish, i.e.:

$$58 \quad \sum_{j=1}^3 Q^{jk} = \sum_{j=1}^3 \frac{P_{IV}^j - P_{bif}^k}{\mathfrak{R}^j / 2} = 0 \quad k = 1, 2, \dots, \text{Bifurcation No.} \quad (S1)$$

59 Here  $P_{IV}^j$  denotes the intravascular pressure in each of the 3 vessels composing the  $k^{\text{th}}$  bifurcation,  
 60 and  $P_{bif}^k$  is the bifurcation pressure. The resistance of each vessel  $n$  ( $\mathfrak{R}^n$ ) is calculated from  
 61 Poiseuille's law, i.e.:

$$62 \quad \mathfrak{R}^n(t) \equiv \frac{Q^n(t)}{P_{in}^n(t) - P_{out}^n(t)} = \frac{128\mu^n(t)L^n}{\pi D^n(t)^4} \quad (S2)$$

63 where  $P_{in}^n$  and  $P_{out}^n$  denote vessel inlet and outlet pressures, respectively.  $L$ ,  $D$  and  $\mu$  are the vessel  
 64 length, diameter and blood apparent viscosity, respectively. Vessel diameter  $D$  varies during the

65 cardiac cycle due to the time-varying intravascular and extravascular (Eq. 3) pressures, according  
 66 to vessel *in-situ* compliance (Eq. 2). Viscosity was taken to vary with diameter and hematocrit  
 67 (Table 1), following Pries et al. (20). Hence both vessel and network resistances are highly non-  
 68 linear.

69 Conservation of mass requires that the difference between vessel in and out discharges  
 70 ( $Q_{in}^n$  and  $Q_{out}^n$ , respectively) should equal the time-derivative of the vessel's volume ( $V^n$ ), i.e.:

$$71 \quad Q_{in}^n(t) - Q_{out}^n(t) = \frac{P_{in}^n(t) - P_{IV}^n(t)}{\mathfrak{R}^n(t)/2} + \frac{P_{out}^n(t) - P_{IV}^n(t)}{\mathfrak{R}^n(t)/2} = \frac{dV^n}{dt} = \frac{d}{dt} \left( \frac{\pi D^2(t)L}{4} \right)^n \quad (S3)$$

72 *Computational Scheme:* Since each bifurcation-pressure  $P_{bif}$  equals either  $P_{in}$  or  $P_{out}$  of the  
 73 vessels forming that bifurcation, Eqs. S1-S3 can be combined, resulting in a system of  $N$  non-  
 74 linear ordinary differential equations ( $N$  denotes the number of network vessels), which was  
 75 iteratively solved using the MATLAB<sup>®</sup> ode15s solver until satisfying periodicity condition. This  
 76 was fulfilled using the shooting method, i.e., after an initial guess of the intravascular pressure in  
 77 each vessel, the numerical scheme was carried out for several cardiac cycles until solutions at  
 78 consecutive cycles converged to within preset tolerance. This tolerance was set as follows: the  
 79 maximum allowed pressure difference (at any of the vessels) between the beginning and the end  
 80 of a cardiac cycle should be <0.1 mmHg. Numerical accuracy of the final solution was  
 81 ascertained based on the criteria that the maximum difference between total flows into the  
 82 feeding artery and out of its draining vein during a cardiac cycle was <5% of the total inflow.

83 **Boundary Conditions:** were adopted from measured data rather than being evaluated from a  
 84 combined heart-vessel model, in view of inevitable approximations required in such a complex  
 85 model and the likewise inevitable need to adjust the model parameters to fit the data.

86 *Inlet, Outlet and Left Ventricle Pressures:*  $P_A(t)$ ,  $P_V(t)$  and  $LVP(t)$  respectively, were taken from  
 87 Hurst & Logue (11). The signals were modified for a specific heart rate (Table 1) by changing the  
 88 diastolic time fraction ( $DTF$ , the period from minimal to maximal time derivative of  $LVP$  divided  
 89 by the cardiac period(6)) taken from measured data (6). The signals amplitudes were scaled  
 90 according to the values listed in Table 1.

91 *Sarcomere Stretch Ratio (SSR)*, required for quantification of intra-myocyte pressure (Eq. 3), has  
 92 been observed to be highly coupled to ventricular volume (1). Thus, the ventricular volume  
 93 waveform (11) was used for the  $SSR$  waveform, subject to 5% elongation from early to end  
 94 diastole, and 16% shortening from end-diastole to end-systole.

95

96

97 **III. In-situ Vessel Compliance-The Vessel-in-Myocardium Micromechanical Sub-Model**

98 Solution of Eq. S1-S3 requires calculation of the instantaneous (pressure-dependent) diameter in  
 99 each vessel through Eq. 2. The diameter-pressure curves described by Eq. 2 were thus obtained  
 100 for each vessel separately by calculating (1), through a vessel-in myocardium sub-model (Fig.  
 101 2C), the lumen diameter under prescribed trans-luminal pressures  $\Delta P$ . This calculation based on  
 102 vessel morphometry (4, 14-16), using a detailed micro-mechanical stress analysis. A simplified  
 103 (22) geometry of two concentric cylinders was considered: each vessel is surrounded by a  
 104 myocardial tissue of circular cross-section. The myocardial outer diameter was taken to satisfy  
 105 the measured 1:7 vessel-to-myocardium area ratio (2, 21). Both tissues are considered  
 106 incompressible and hyperelastic (see below), having common interface. Calculation of the  
 107 pressurized (loaded) lumen diameter requires the stress free (reference) configuration of vessel  
 108 and of myocardium. Hence, the vessel-in-myocardium model equations presented below were  
 109 initially solved at several loading configurations to determine the (unknown) stress free  
 110 configurations.

111 **Model Equations: Kinematics:** The axi-symmetric mappings between each pair of  
 112 configurations (see below)  $i$  and  $i+1$  in cylindrical coordinates is  $(r, \theta, z)_i \rightarrow (r, \theta, z)_{i+1}$   
 113 prescribed by:

$$114 \quad r_{i+1} = r_{i+1}(r_i); \quad \theta_{i+1} = (OA_{i+1} / OA_i) \cdot \theta_i; \quad z_{i+1} = \Lambda_{i+1,i} \cdot z_i \quad (S4)$$

115 where OA denotes the cylinder opening angle,  $L$  is its length and the stretch ratio  
 116  $\Lambda_{i+1,i} = L_{i+1} / L_i$ . Incompressibility implies that:

$$117 \quad r_{i+1} = \sqrt{\left(r_{i+1}^{in}\right)^2 + \left[\left(r_i\right)^2 - \left(r_i^{in}\right)^2\right] \cdot \left(OA_i / OA_{i+1}\right) / \Lambda_{i+1,i}} \quad (S5)$$

118 The Green-Lagrange strain is  $\mathbf{E} = (\mathbf{F}^T \mathbf{F} - \mathbf{I}) / 2$  where  $\mathbf{I}$  is unit matrix and  $\mathbf{F}$  - the deformation  
 119 gradient for each mapping between configurations. Assuming no twist,  $\mathbf{F}$  is given by:

$$120 \quad \mathbf{F} = \text{diag}(\partial r_{i+1} / \partial r_i, \Lambda_{i+1,i} \cdot OA_{i+1} / OA_i, \Lambda_{i+1,i}) \quad (S6)$$

121 Explicit expressions for the deformation gradient of each mapping are given below.

122 **Equilibrium Equations:** The Cauchy stress tensor  $\mathbf{T}$  is derived from the strain energy  
 123 function  $W$  of each material (vessel wall and myocardium, see below) via the hyperelastic  
 124 relationship  $\mathbf{T} = -P\mathbf{I} + \mathbf{F} \cdot (\partial W / \partial \mathbf{E}) \cdot \mathbf{F}^T$ . The equilibrium equations in the circumferential and  
 125 axial directions imply that the Cauchy stress components  $T_{r\theta}$  and  $T_{rz}$  vanish. The radial force  
 126 equilibrium equation is  $\partial T_{rr} / \partial r + (T_{rr} - T_{\theta\theta}) / r = 0$ . By applying the axial and radial

127 equilibrium equations, the external axial force  $F_z$  and the trans-luminal pressure  $\Delta P$  can be  
 128 expressed in terms of the components  $T_{ij}$  of the tissue stress tensor  $\mathbf{T}$  as follows (10):

$$129 \quad F_z = \pi \int_{r_{in}}^{r_{out}} (2T_{zz} - T_{rr} - T_{\theta\theta}) r dr; \quad \Delta P = \int_{r_{in}}^{r_{out}} \frac{T_{\theta\theta} - T_{rr}}{r} dr \quad (S7)$$

130

131 **The Reference Configuration:** The available data consists of statistics of the *in-situ* diameter,  
 132 length and wall thickness (4, 14-16) taken under fixed intravascular pressure (*vessel cast*  
 133 *configuration*). The data however, do not account for transmural morphometric heterogeneity.  
 134 Under the assumption of larger subendocardial vessels (see methods), the reconstructed diameters  
 135 were first modified by up to  $\pm 10\%$  from the vessel cast values in a linear transmural manner. To  
 136 obtain the reference configurations, the vessel/myocardium equilibrium equations (Eqs. S7) were  
 137 solved subject to the relevant mappings and loading boundary conditions. The latter are:

138 (i) *The Cast Configuration:* Kassab and co-workers (4, 14-16) diameters were measured under  
 139 fixed cast pressure. The loading conditions in this configuration  
 140 are  $\Delta P^v + \Delta P^m = \text{casting pressure}$  where v and m superscripts denote the vessel and  
 141 myocardium, respectively. Each vessel's specific cast pressure was taken from a steady state  
 142 coronary flow analysis (19) based also on Kassab data.

143 (ii) *The Unloaded Configuration:* The transition to this configuration is prescribed by the  
 144 mapping from the cast configuration. The loading conditions here are  
 145  $F_z^v + F_z^m = 0; \quad \Delta P^v + \Delta P^m = 0$ . Based on previous data (7) the axial stretch was taken to  
 146 remain constant during this mapping.

147 (iii) *The Un-tethered Configuration:* Unloaded coronary vessels are not stress-free. When  
 148 myocardial tethering is removed, large epicardial arteries were found to shorten by 0% in human  
 149 ex-vivo (9) and 30% in swine (23) (i.e., vessels' tethering stretch ranges between 1.0 and 1.4,  
 150 Table 1). The un-tethered configuration was obtained upon mapping from the tethered unloaded  
 151 configuration. The loading conditions in this un-tethered state are  
 152  $F_z^v = 0; \quad F_z^m = 0; \quad \Delta P^v + \Delta P^m = 0$  where it is assumed that the two cylinders maintain a  
 153 common but stress-free interface.

154 (iv) *The Stress-Free (Reference) Configuration:* The tethered-free vessel and myocardium are  
 155 still not stress-free, but rather loaded by internal residual stress. Their magnitudes are quantified  
 156 by the measured OA of the corresponding cylinders when cut open. For coronary vessels, OA are  
 157 specimen dependent. For the myocardium OA = 2.75 rad. (17).

158 The stress-free reference configuration is obtained by mapping between configurations A and D.  
 159 *The deformation gradient tensor:* The deformation gradient  $\mathbf{F}$  is determined by the mapping of  
 160 coordinates between two loading configurations. Specifically, the transition from stress-free (*sf*  
 161 subscript) to un-tethered (*unt*), un-tethered to unloaded (*unld*), and unloaded to loaded  
 162 configurations, combined with tissue incompressibility, leads to:  
 163

$$\begin{aligned}
 F_{sf \rightarrow unt}^{v/m} &= \text{diag} \left( \frac{OA^{v/m} r_{sf}^{v/m, in}}{\pi r_{unt}^{v/m, in} \Lambda_{unt, sf}^{v/m}}, \frac{\pi r_{unt}^{v/m, in}}{OA^{v/m} r_{sf}^{v/m, in}}, \Lambda_{unt, sf}^{v/m} \right) \\
 F_{unt \rightarrow unld}^{v/m} &= \text{diag} \left( \frac{r_{unt}^{v/m, in}}{r_{unld}^{v/m, in} \Lambda_{unld, unt}^{v/m}}, \frac{r_{unld}^{v/m, in}}{r_{unt}^{v/m, in}}, \Lambda_{unld, unt}^{v/m} \right) \\
 F_{unld \rightarrow load}^{v/m} &= \text{diag} \left( \frac{r_{unld}^{v/m, in}}{r_{load}^{v/m, in} \Lambda_{load, unld}^{v/m}}, \frac{r_{load}^{v/m, in}}{r_{unld}^{v/m, in}}, \Lambda_{load, unld}^{v/m} \right)
 \end{aligned} \tag{S8}$$

165  
 166  
 167 Here the superscript v/m denotes the specific cylinder: either vessel wall (v) or myocardium (m),  
 168  $r^{in}$  is the cylinder internal radius, and  $\Lambda$  is the axial stretch. The effect of dynamic axial stretch  
 169 was previously (1) shown to have small effect on the predicted results and was thus not accounted  
 170 for.

171 ***Vessel and Myocardium Constitutive Properties:*** The description of the multiaxial material laws  
 172 of vessel wall (23) and of the myocardium (18) are based on Fung-type pseudostrain energy  
 173 functions:

$$\begin{aligned}
 W &= \frac{C_1}{2} (\exp(Q) - 1) \\
 Q^v &= C_2^v E_{\Theta\Theta}^2 + C_3^v E_{ZZ}^2 + C_4^v E_{RR}^2 + 2(C_5^v E_{\Theta\Theta} E_{ZZ} + C_6^v E_{ZZ} E_{RR} + C_7^v E_{\Theta\Theta} E_{RR}) \\
 Q^m &= C_2^m (I_1 - 3)^2 + C_3^m (I_1 - 3)(I_4 - 1) + C_4^m (I_4 - 1)^2
 \end{aligned} \tag{S9}$$

175 Here  $I_1$  and  $I_4$  are the first and fourth strain invariants respectively, and  $E_{ii}$  are the components of  
 176 the Green-Lagrange strain tensor.

177 The parameters C were previously estimated for 10 vessel samples (23) and 7 myocardial samples  
 178 (18). To obtain a representative vessel/myocardium pair, each of the 10 vessel parameter sets (23)  
 179 was combined with each of the 7 parameter sets of the passive myocardial samples (18), and  
 180 properties of each of the vessel/myocardium pairs was used as inputs to evaluate the four

181 parameter of Eq. 2. The pair having the best fit to the *in-situ* data of swine large coronary arteries  
182 (8) (Fig. 2C) was used for flow analysis.

183 **Computational scheme:** To derive the stress-free configuration from the vessel cast (input) one,  
184 the internal and external radii of both cylinders (vessel wall and myocardium) at the three  
185 unknown configurations (unloaded, un-tethered and stress-free) are required. In addition to these  
186 12 unknowns, 3 axial stretches need to be determined: the stretches of both vessel wall and  
187 myocardium due to closure of the opening angle ( $\Lambda_{unt,sf}^v$  and  $\Lambda_{unt,sf}^m$ , respectively), and the  
188 myocardium stretch due to tethering,  $\Lambda_{unld,unt}^m$ . The vessels' tethering stretch  $\Lambda_{unld,unt}^v$  (Table 1), is  
189 a measured input. Hence the total number of unknowns is 15.

190 The cast internal and external radii are known from the data. Hence, in each unknown  
191 configuration and for each tissue (vessel and myocardium), for each given internal radius the  
192 incompressibility condition (Eq. S5) yields the corresponding external one. Additionally, the  
193 assumption of common interface between cylinders at each of the above three configurations  
194 eliminates three more unknowns. Thus the number of unknowns is reduced from 15 to 6 (i.e., the  
195 vessel internal radii in stress-free, un-tethered and unloaded configurations;  $r_{sf}^{v,in}$ ,  $r_{unt}^{v,in}$  and  $r_{unld}^{v,in}$ ,  
196 respectively, and the three unknown axial stretches listed above).

197 The six unknowns were calculated by applying the vessel-in-myocardium model  
198 equations under the six loading boundary conditions listed above (one in section i, two in ii and  
199 three in iii). The solution of this highly non-linear system was obtained by MATLAB<sup>®</sup> ga code  
200 for genetic algorithm search and MATLAB<sup>®</sup> fsolve.

201 With the stress-free configuration determined, the vasodilated vessel diameters were  
202 evaluated (using the above MATLAB<sup>®</sup> codes) to optimally satisfy force equilibrium (Eqs. S7),  
203 subject to the vessel transvascular pressure. These values were presented as surfaces of  
204  $D = D(D_{cast}, \Delta P)$  for 3 vessel types: arteries, capillaries, and vein. Based on the experimental  
205 results of Hamza et al. (8), the above response surfaces were fitted for each vessel by a sigmoid  
206 function (Eq. 2). The maximum and mean errors associated with this fit relative to the exact  
207 solution was found to be 6% and <1%, respectively in all vessels under all simulated loading  
208 conditions.

209  
210  
211  
212

213 REFERENCES

214

- 215 1. **Algranati D, Kassab GS, and Lanir Y.** Mechanisms of myocardium-coronary  
216 vessel interaction. *Am J Physiol Heart Circ Physiol* 298: H861-873, 2010.
- 217 2. **Aliev MK, Dos Santos P, Hoerter JA, Soboll S, Tikhonov AN, and Saks VA.**  
218 Water content and its intracellular distribution in intact and saline perfused rat hearts  
219 revisited. *Cardiovasc Res* 53: 48-58, 2002.
- 220 3. **Bassingthwaighte JB, Yipintsoi T, and Harvey RB.** Microvasculature of the  
221 dog left ventricular myocardium. *Microvasc Res* 7: 229-249, 1974.
- 222 4. **Choy JS and Kassab GS.** Wall thickness of coronary vessels varies transmurally  
223 in the LV but not the RV: implications for local stress distribution. *Am J Physiol Heart*  
224 *Circ Physiol* 297: H750-758, 2009.
- 225 5. **Fibich G, Lanir Y, and Liron N.** Mathematical model of blood flow in a  
226 coronary capillary. *Am J Physiol* 265: H1829-1840, 1993.
- 227 6. **Fokkema DS, VanTeeffelen JW, Dekker S, Vergroesen I, Reitsma JB, and**  
228 **Spaan JA.** Diastolic time fraction as a determinant of subendocardial perfusion. *Am J*  
229 *Physiol Heart Circ Physiol* 288: H2450-2456, 2005.
- 230 7. **Guo X and Kassab GS.** Variation of mechanical properties along the length of  
231 the aorta in C57bl/6 mice. *Am J Physiol Heart Circ Physiol* 285: H2614-2622, 2003.
- 232 8. **Hamza LH, Dang Q, Lu X, Mian A, Molloi S, and Kassab GS.** Effect of  
233 passive myocardium on the compliance of porcine coronary arteries. *Am J Physiol Heart*  
234 *Circ Physiol* 285: H653-660, 2003.
- 235 9. **Holzapfel GA, Sommer G, Gasser CT, and Regitnig P.** Determination of layer-  
236 specific mechanical properties of human coronary arteries with nonatherosclerotic intimal  
237 thickening and related constitutive modeling. *Am J Physiol Heart Circ Physiol* 289:  
238 H2048-2058, 2005.
- 239 10. **Humphrey JD.** *Cardiovascular solid mechanics: cells, tissues, and organs.* New  
240 York: Springer, 2002.
- 241 11. **Hurst JW and Logue RB.** *The Heart, Arteries, and Veins.* New York: McGraw-  
242 Hill, 1970, p. 77.
- 243 12. **Jacobs J, Algranati D, and Lanir Y.** Lumped flow modeling in dynamically  
244 loaded coronary vessels. *J Biomech Eng* 130: 054504, 2008.



- 245 13. **Kaimovitz B, Lanir Y, and Kassab GS.** Large-scale 3-D geometric  
246 reconstruction of the porcine coronary arterial vasculature based on detailed anatomical  
247 data. *Ann Biomed Eng* 33: 1517-1535, 2005.
- 248 14. **Kassab GS and Fung YC.** Topology and dimensions of pig coronary capillary  
249 network. *Am J Physiol* 267: H319-325, 1994.
- 250 15. **Kassab GS, Lin DH, and Fung YC.** Morphometry of pig coronary venous  
251 system. *Am J Physiol* 267: H2100-2113, 1994.
- 252 16. **Kassab GS, Rider CA, Tang NJ, and Fung YC.** Morphometry of pig coronary  
253 arterial trees. *Am J Physiol* 265: H350-365, 1993.
- 254 17. **Lanir Y, Hayam G, Abovsky M, Zlotnick AY, Uretzky G, Nevo E, and Ben-**  
255 **Haim SA.** Effect of myocardial swelling on residual strain in the left ventricle of the rat.  
256 *Am J Physiol* 270: H1736-1743, 1996.
- 257 18. **Lin DH and Yin FC.** A multiaxial constitutive law for mammalian left  
258 ventricular myocardium in steady-state barium contracture or tetanus. *J Biomech Eng*  
259 120: 504-517, 1998.
- 260 19. **Mittal N, Zhou Y, Linares C, Ung S, Kaimovitz B, Molloy S, and Kassab GS.**  
261 Analysis of blood flow in the entire coronary arterial tree. *Am J Physiol Heart Circ*  
262 *Physiol* 289: H439-446, 2005.
- 263 20. **Pries AR, Secomb TW, Gessner T, Sperandio MB, Gross JF, and Gaetgens**  
264 **P.** Resistance to blood flow in microvessels in vivo. *Circ Res* 75: 904-915, 1994.
- 265 21. **Spaan JA.** *Coronary blood flow: mechanics, distribution, and control.* Dordrecht:  
266 Kluwer, 1991.
- 267 22. **Vis MA, Sipkema P, and Westerhof N.** Modeling pressure-area relations of  
268 coronary blood vessels embedded in cardiac muscle in diastole and systole. *Am J Physiol*  
269 268: H2531-2543, 1995.
- 270 23. **Wang C, Garcia M, Lu X, Lanir Y, and Kassab GS.** Three-dimensional  
271 mechanical properties of porcine coronary arteries: a validated two-layer model. *Am J*  
272 *Physiol Heart Circ Physiol* 291: H1200-1209, 2006.
- 273
- 274
